# Supplementary material for: Synthesis of a biphenylene nanoribbon by compressing biphenylene under extreme conditions
Source: Royal Society of Chemistry journal article supplement (doi:10.1039/d5cp00083a), 2025-01-01
Supplement: d5cp00083a10.pdf [file d5cp00083a10.pdf]

## **Synthesis of the Biphenylene Nanoribbon by Compressing the Biphenylene under Extreme Conditions**

Zilin Zhao,<sup>a</sup> Guangwei Che,<sup>a</sup> Fang Li,<sup>a</sup> Yunfan Fei,<sup>a</sup> Hao Luo,<sup>a</sup> Puyi Lang,<sup>a</sup> Qingchao Zeng,<sup>a</sup> Hongcun Bai,<sup>b</sup>

Yajie Wang,<sup>\*a</sup> Ho-kwang Mao,<sup>a</sup> Haiyan Zheng <sup>\*a</sup> and Kuo Li <sup>\*a</sup>

<sup>a</sup>Center for High Pressure Science and Technology Advanced Research, Beijing 100193, People's

Republic of China.

<sup>b</sup>Ningxia University, Ningxia 750021, People's Republic of China.

\*E-mail: [likuo@hpstar.ac.cn](mailto:likuo@hpstar.ac.cn), [zhenghy@hpstar.ac.cn](mailto:zhenghy@hpstar.ac.cn), [yajie.wang@hpstar.ac.cn](mailto:yajie.wang@hpstar.ac.cn).

**Table S1.** Assignments of IR modes of biphenylene by density functional theory (DFT) calculation.

| Assignments                           | Calculation<br>(0 K, 0 GPa) | Experiment<br>(0.66 GPa) |
|---------------------------------------|-----------------------------|--------------------------|
| Skeletal formation                    | 603                         | 610                      |
| Skeletal formation                    | 712                         | 718                      |
| $\gamma_{\text{CH}}$                  | 726                         | 739                      |
| $\nu_{\text{CH}}$                     | 731                         |                          |
| $\nu_{\text{CH}}$                     | 744                         | 751                      |
| $\nu_{\text{CH+CC}}$                  | 792                         | 793                      |
| $\nu_{\text{CH}}$                     | 872                         | 881                      |
| $\nu_{\text{CH}}$                     | 884                         | 890                      |
| $\nu_{\text{CH}}$                     | 915                         | 925                      |
| $\nu_{\text{CH}}$                     | 922                         | 928                      |
| $\nu_{\text{CH}}$                     | 926                         |                          |
| Skeletal formation                    | 972                         | 962                      |
| $\nu_{\text{CH}}$                     | 978                         | 971                      |
| $\beta_{\text{CH}}$                   | 993                         | 991                      |
| $\beta_{\text{CH}}$                   | 1019                        | 1020                     |
| $\beta_{\text{CH}}$                   | 1021                        | 1025                     |
| $\beta_{\text{CH}}$                   | 1046                        | 1054                     |
| $\beta_{\text{CH}}$                   | 1049                        | 1058                     |
| $\beta_{\text{CH}}$                   | 1081                        | 1087                     |
| $\beta_{\text{CH}}$                   | 1109                        | 1106                     |
| $\beta_{\text{CH}}$                   | 1116                        | 1114                     |
| $\beta_{\text{CH}}$                   | 1118                        | 1125                     |
| $\beta_{\text{CH}}$                   | 1123                        | 1134                     |
| $\beta_{\text{CH}}$                   | 1148                        | 1153                     |
| $\beta_{\text{CH}}$                   | 1150                        | 1155                     |
| $\beta_{\text{CH}}$                   | 1157                        | 1169                     |
| $\beta_{\text{CH}}$                   | 1255                        | 1246                     |
| $\beta_{\text{CH}}$                   | 1256                        | 1262                     |
| $\beta_{\text{CH}}$                   | 1257                        | 1269                     |
| Skeletal formation                    | 1299                        |                          |
| $\beta_{\text{CH}}$                   | 1413                        | 1422                     |
| $\beta_{\text{CH}}$                   | 1416                        | 1424                     |
| $\beta_{\text{CH}}$                   | 1433                        | 1444                     |
| $\beta_{\text{CH}} + \nu_{\text{CC}}$ | 1570                        |                          |
| $\beta_{\text{CH}} + \nu_{\text{CC}}$ | 1576                        | 1584                     |
| $\nu_{\text{CH}}$                     | 3091                        |                          |
| $\nu_{\text{CH}}$                     | 3096                        | 3014                     |
| $\nu_{\text{CH}}$                     | 3112                        | 3058                     |
| $\nu_{\text{CH}}$                     | 3119                        | 3075                     |

Note:  $\gamma$  represents out-of-plane bending vibration;  $\nu$  represents stretching vibration;  $\beta$  stands for in-plane bending vibration.

**Table S2.** Lattice constants for Poly-BPH (0 K, 0 GPa).

|                               | Poly-BPH |
|-------------------------------|----------|
| $a$ (Å)                       | 4.2879   |
| $b$ (Å)                       | 4.0518   |
| $c$ (Å)                       | 8.7744   |
| $\alpha$ (°)                  | 81.1247  |
| $\beta$ (°)                   | 84.3549  |
| $\gamma$ (°)                  | 85.3458  |
| Cell Volume (Å <sup>3</sup> ) | 149.550  |

**Table S3.** Atomic coordinates for Poly-BPH (0 K, 0 GPa).

| Atom | x       | y        | z       |
|------|---------|----------|---------|
| H1   | 0.12928 | 0.76044  | 0.94504 |
| H2   | 0.64977 | 0.93314  | 0.90437 |
| H3   | 0.86486 | 1.02498  | 0.61907 |
| C4   | 0.67149 | 0.47662  | 0.41040 |
| C5   | 0.89966 | 0.43244  | 0.27651 |
| C6   | 0.73494 | 0.27498  | 0.16425 |
| C7   | 0.43910 | 0.18038  | 0.18653 |
| C8   | 0.21037 | 0.22384  | 0.32517 |
| C9   | 0.37438 | 0.38064  | 0.43279 |
| H10  | 0.02371 | 0.32149  | 0.78222 |
| H11  | 0.87072 | 0.23956  | 0.05496 |
| H12  | 0.35023 | 0.06686  | 0.09563 |
| H13  | 0.13514 | -0.02498 | 0.38093 |
| C14  | 0.32851 | 0.52338  | 0.58960 |
| C15  | 0.10034 | 0.56756  | 0.72349 |
| C16  | 0.26506 | 0.72502  | 0.83575 |
| C17  | 0.56090 | 0.81962  | 0.81347 |
| C18  | 0.78963 | 0.77616  | 0.67483 |
| C19  | 0.62562 | 0.61936  | 0.56721 |
| H20  | 0.97629 | 0.67851  | 0.21778 |

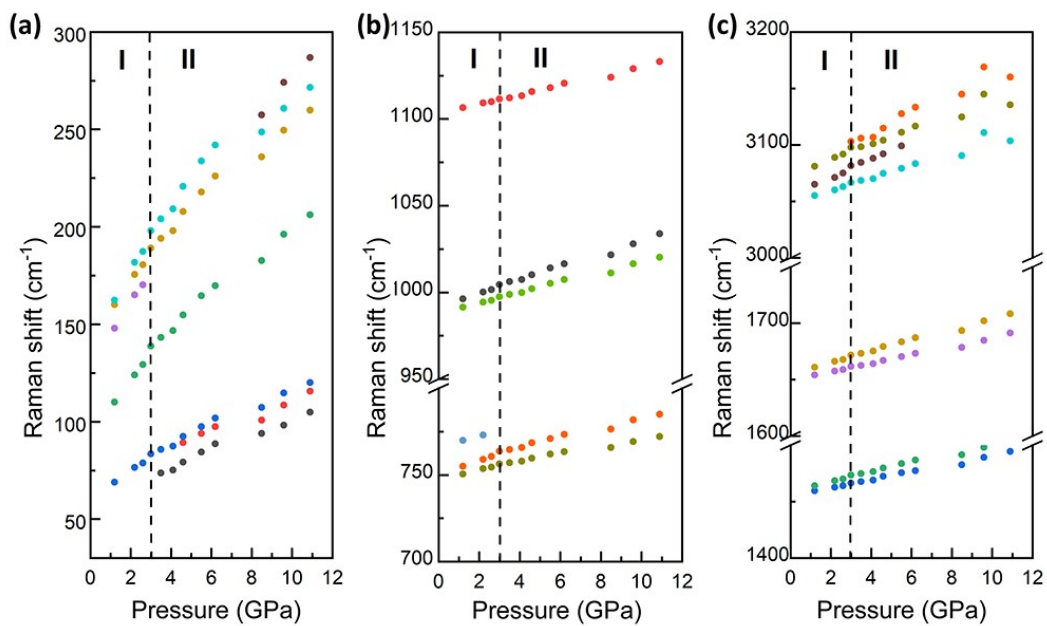

**Figure S1.** Pressure dependences of the Raman shifts ( $\text{cm}^{-1}$ ) of biphenylene at room temperature. The dotted line represents the boundaries of different phases.

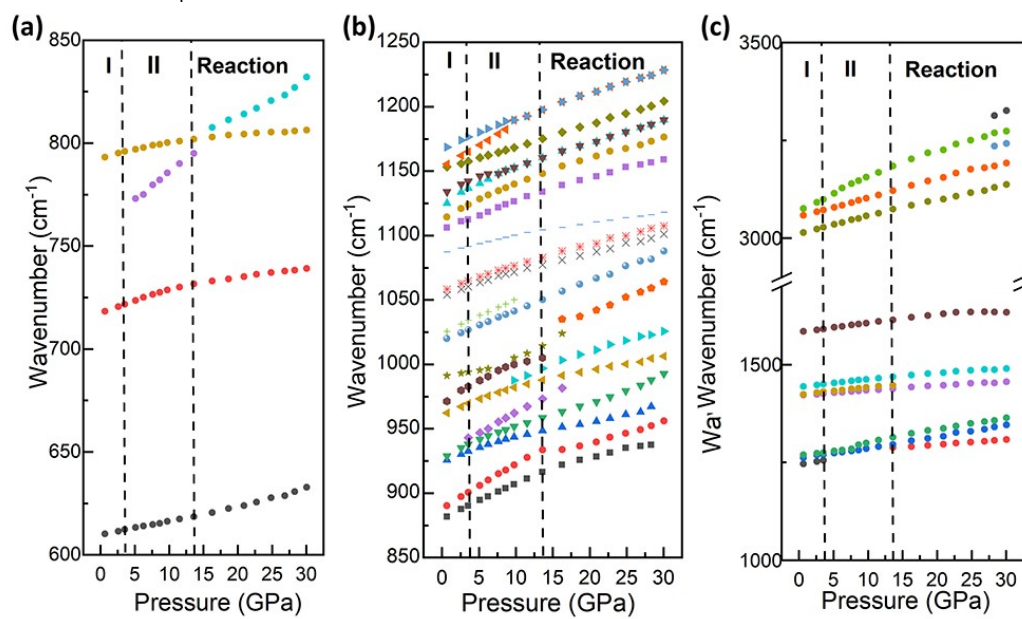

**Figure S2.** Pressure dependences of the Infrared active modes ( $\text{cm}^{-1}$ ) of biphenylene at room temperature. The dotted line represents the boundaries of different phases.

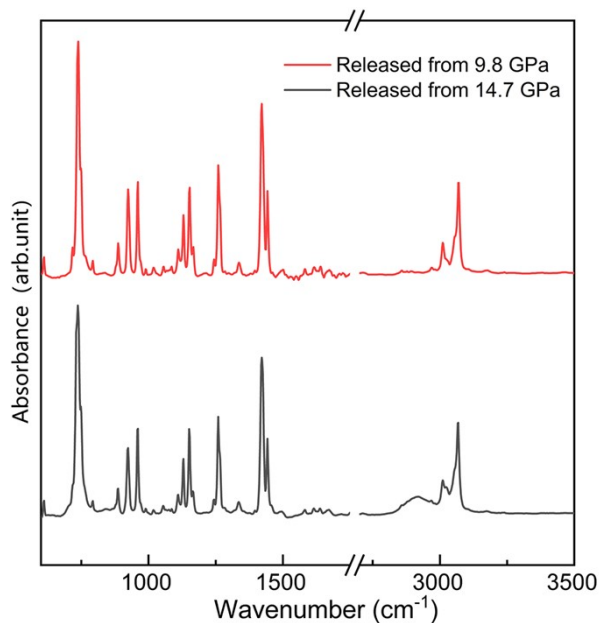

**Figure S3.** Infrared spectra of recovered biphenylene polymeric product from selected pressures.

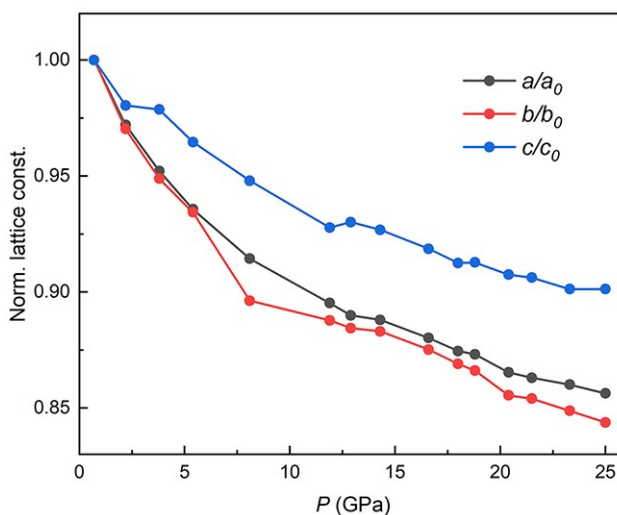

**Figure S4.** Evolution of corresponding compression ratio of lattice parameters from 0.9 to 25.0 GPa.

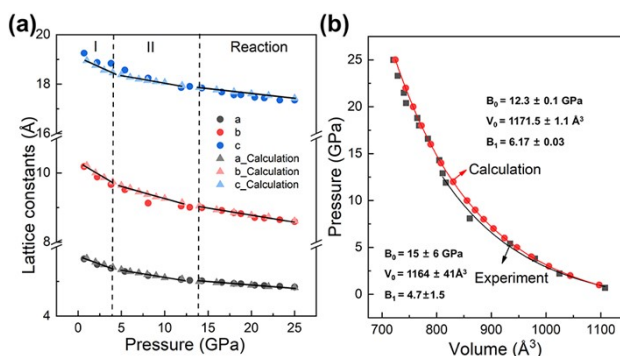

**Figure S5.** (a) Variations of lattice parameters during compression, as determined from experiments (solid circles) and DFT calculations (solid triangles). (b) Pressure dependence of the unit cell volume of biphenylene. The black squares represent experimental results and the red circles represent DFT calculations. The solid lines represent the fitting results of the 3<sup>rd</sup> order Birch–Murnaghan equation of state.

Step 10000

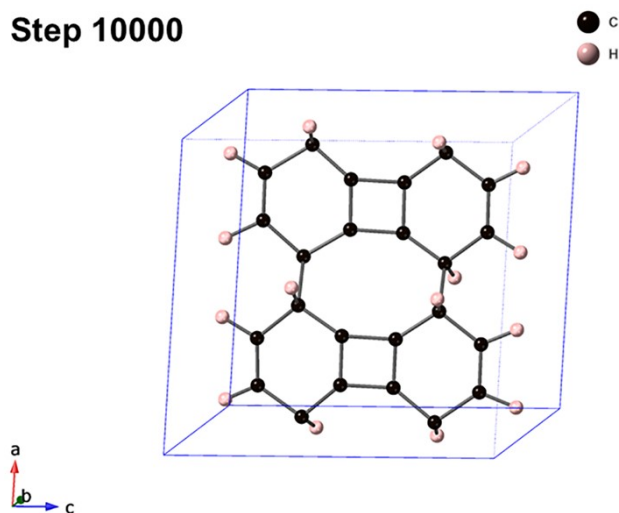

Figure S6. Crystal Structure of Poly-BPH at 300 K, simulated by molecular dynamic.

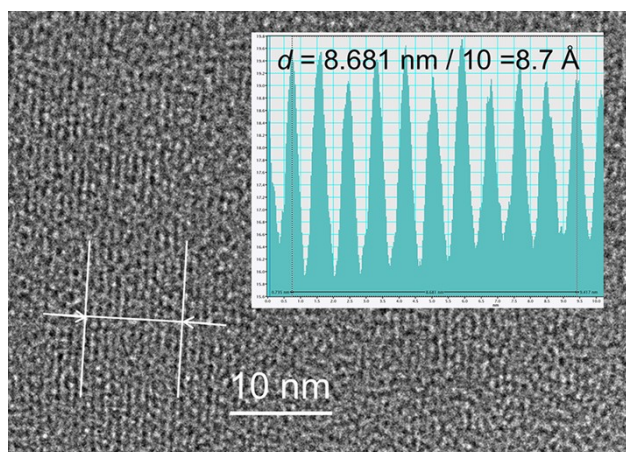

Figure S7. High-resolution transmission electron microscopy of poly-biphenylene.

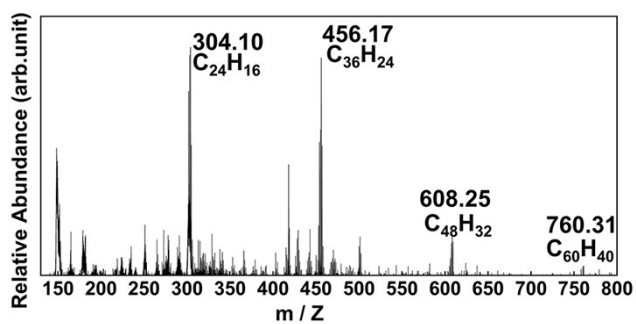

Figure S8. Matrix-assisted laser Desorption Ionization Time of Flight Mass Spectrometry (MALDI-TOF-MS) characterization of PE25 in the dichloromethane with the *trans*-2-[3-(4-*tert*-Butylphenyl)-2-methyl-2-propenylidene] malononitrile (DCTB) as matrix. The signals at  $m/z = 250$ , and  $500$  are the peaks of DCTB clusters.
