# Supplementary figures and images for: Synthesis of a biphenylene nanoribbon by compressing biphenylene under extreme conditions
Source: Royal Society of Chemistry journal article supplement (doi:10.1039/d5cp00083a), 2025-01-01

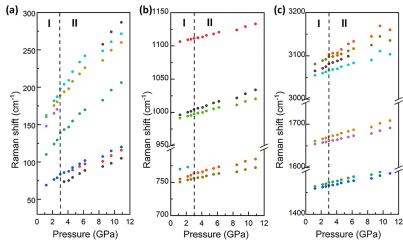

Supplement: d5cp00083a2.pdf [file d5cp00083a2.pdf]

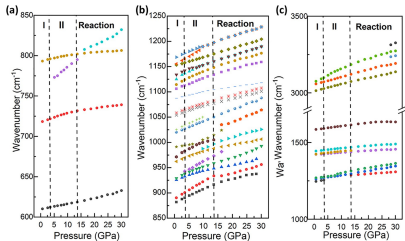

Supplement: d5cp00083a3.pdf [file d5cp00083a3.pdf]

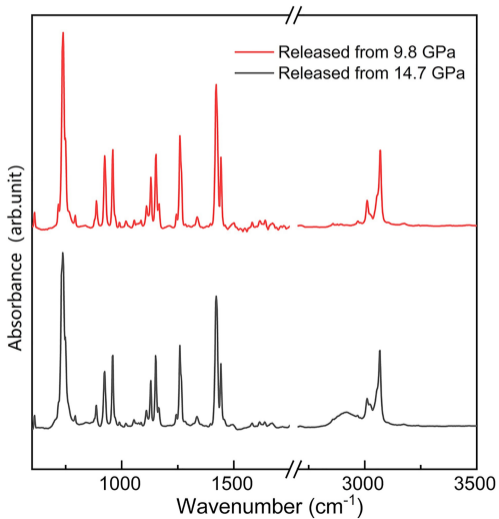

Supplement: d5cp00083a4.pdf [file d5cp00083a4.pdf]

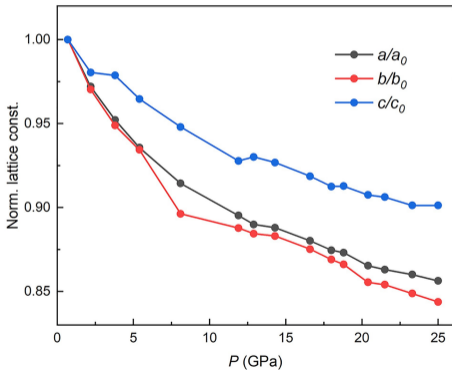

Supplement: d5cp00083a5.pdf [file d5cp00083a5.pdf]

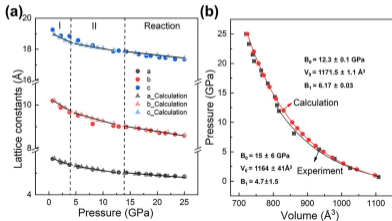

Supplement: d5cp00083a6.pdf [file d5cp00083a6.pdf]

## Step 10000

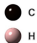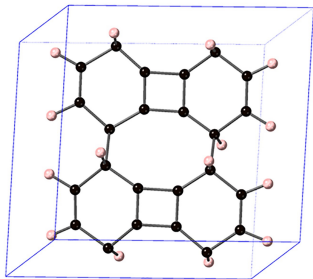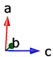

Supplement: d5cp00083a7.pdf [file d5cp00083a7.pdf]

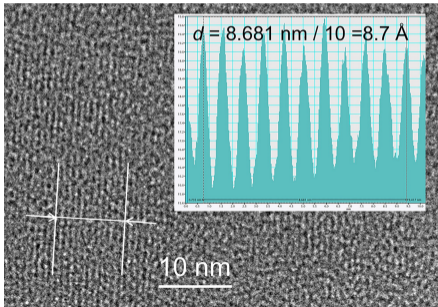

Supplement: d5cp00083a8.pdf [file d5cp00083a8.pdf]

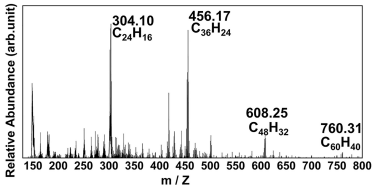

Supplement: d5cp00083a9.pdf [file d5cp00083a9.pdf]
